# Supplementary material for: Links between fecal microbiota and the response to vaccination against influenza A virus in pigs
Source: PubMed Central journal article supplement (PMC8298503; doi:10.1038/s41541-021-00351-2), 2021-07-22
Supplement: 41541_2021_351_MOESM1_ESM.pdf [file 41541_2021_351_MOESM1_ESM.pdf]

## Supplementary Information

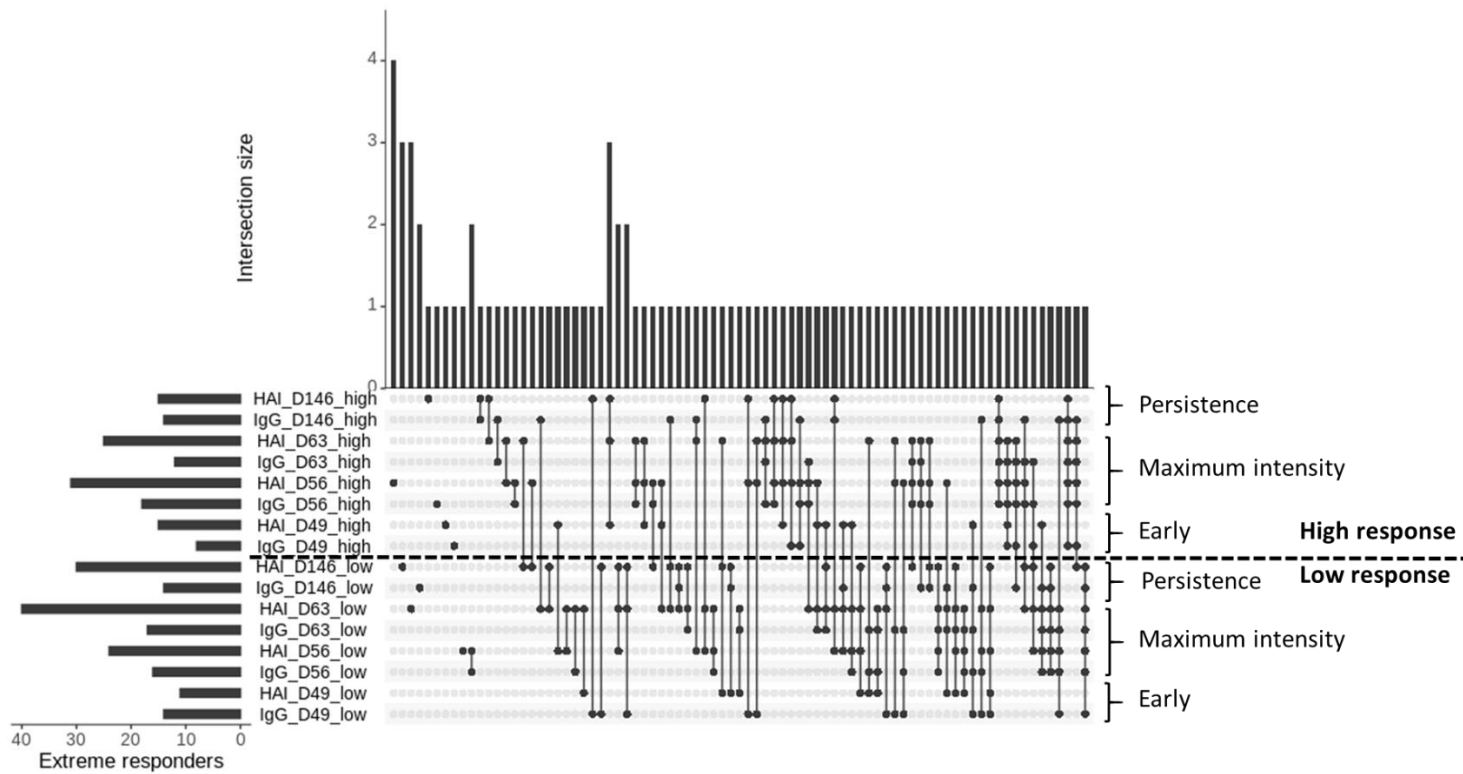

**Supplementary Figure 1: Matrix layout for all intersections of extreme responders for IAV-specific IgG levels and HAI titers at D49, D56, D63 and D146.** Dark circles in the matrix indicate sets that are part of the intersection. The black bars on the left side of the figure indicate the total number of extreme high or low responders per group. The dotted line separates the two sets of high and low responder groups into subsets corresponding to early response (49 days of age on the boost day, three weeks after the first vaccine injection), the maximum intensity response at 56 and 63 days of age (one and two weeks after the boost) and the persistence of Ab response at 146 days of age (118 days post-vaccination).

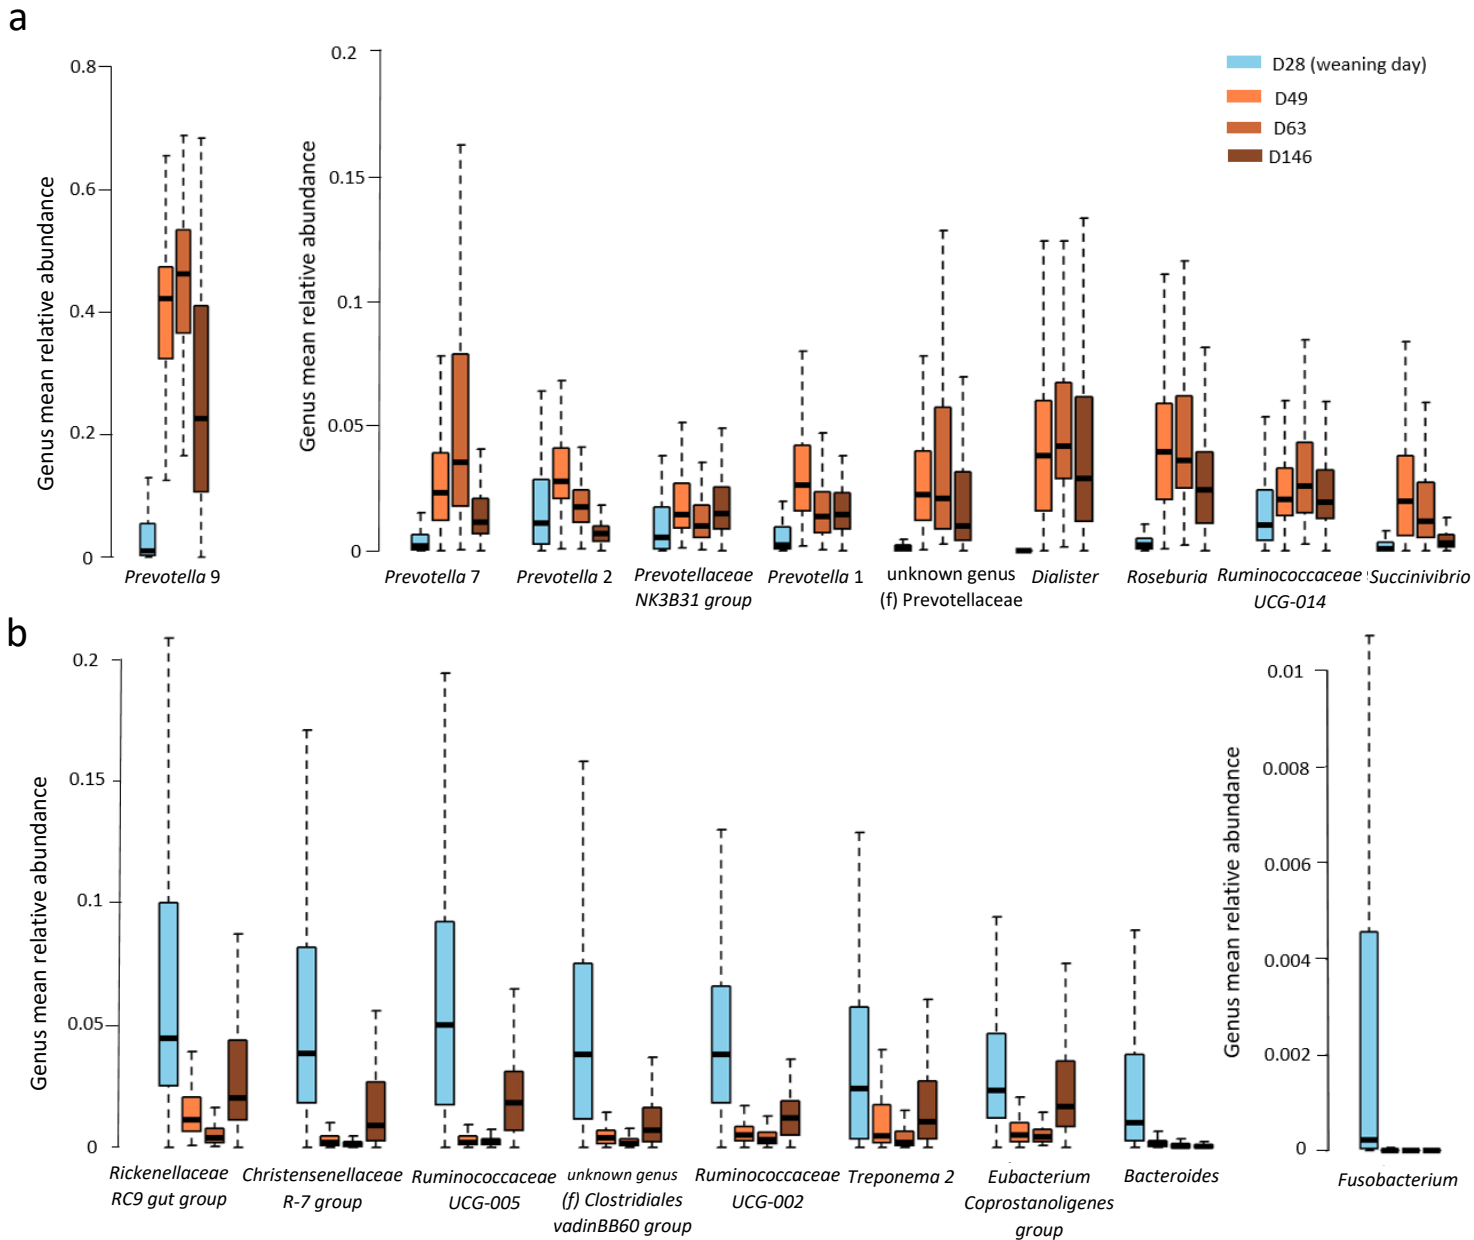

**Supplementary Figure 2: Evolution of the relative abundance of the main genera of fecal microbiota from D28 to D146.** The relative abundances of all genera are represented by boxplots colored according to animal age; blue at D28 and an orange gradient from pale to dark for D49, D63, and D146. **a** Relative abundances of the ten main bacterial genera observed at D63, with their corresponding abundances at D28, D49, and D146. **b** Relative abundances of the nine main bacterial genera observed at D28, with their corresponding abundances at D49, D63, and D146. *Prevotella 9*, as the most abundant genus in the D63 fecal microbiota and the eighth most abundant genus in the D28 fecal microbiota, is represented only once. Corresponding data are available in Supplementary Data 3.

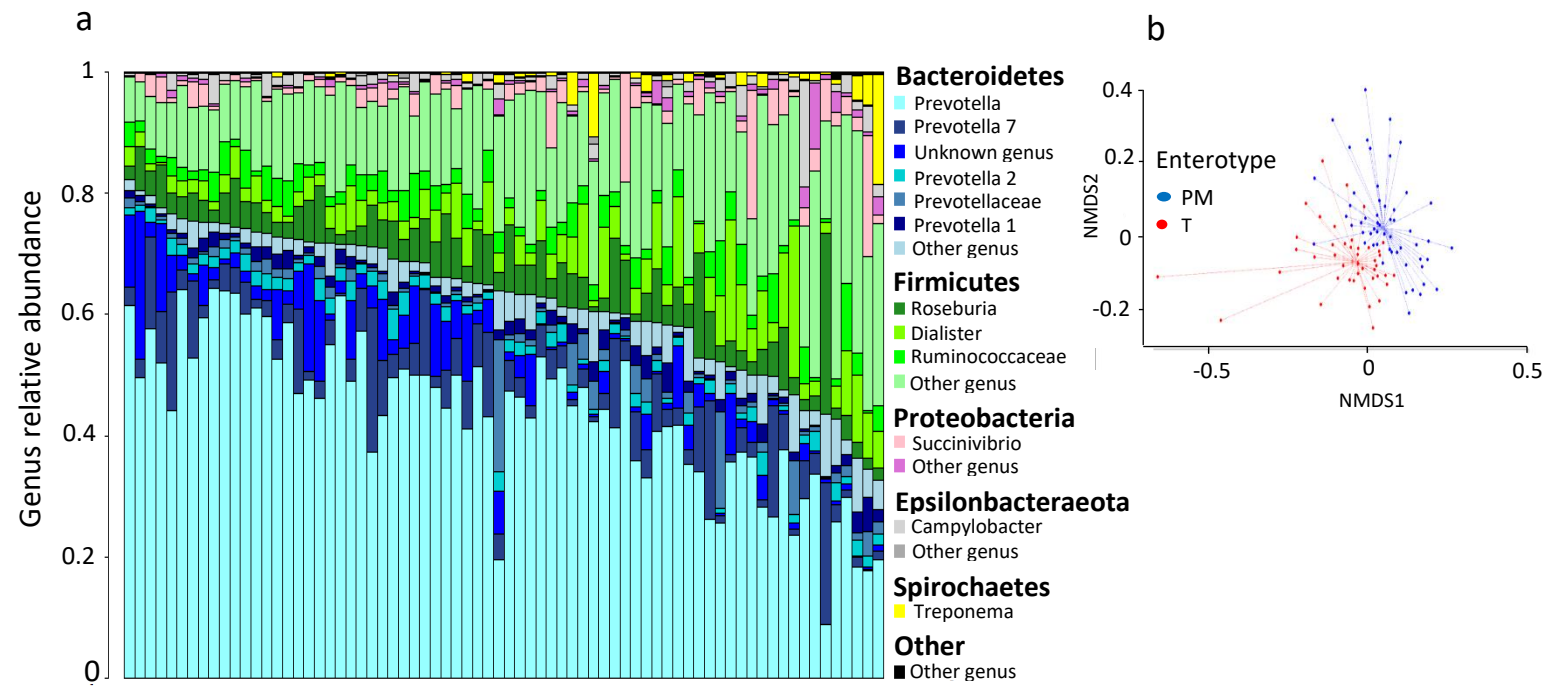

**Supplementary Figure 3. Composition of fecal microbiota of vaccinated pigs at D63 and visualization of clustering according to two enterotypes.** **a** Relative abundances of bacterial genera in the fecal microbiota of 74 vaccinated pigs in which the composition of the fecal microbiota was followed from D28 to D146 (slaughter). Only genera with mean abundances over 1.8% are represented, with the exception of *Campylobacter* and *Treponema 2*. **b** Distribution of pigs between the enterotypes PM (*Prevotella-Mitsuokella*) and T (*Treponema*). Animals corresponding to enterotypes PM and T are represented by blue and red dots, respectively. All data are available in Supplementary Table 2 and in Supplementary Data 3.

**a**

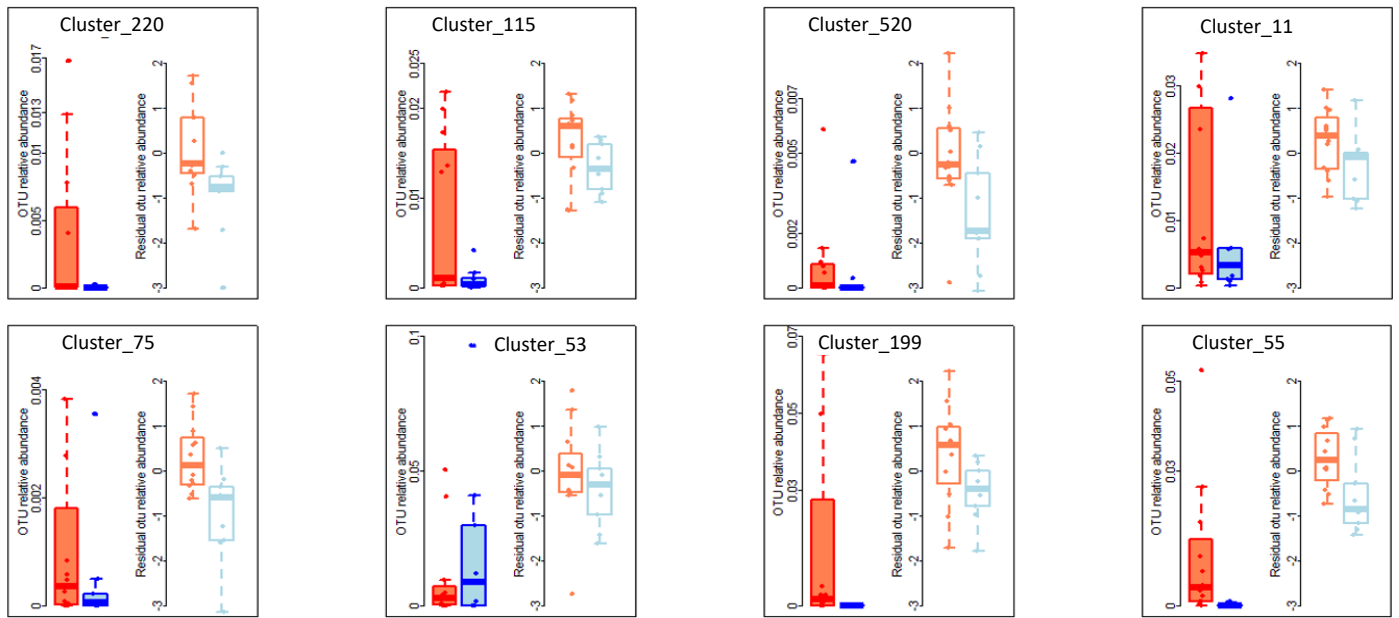

**b**

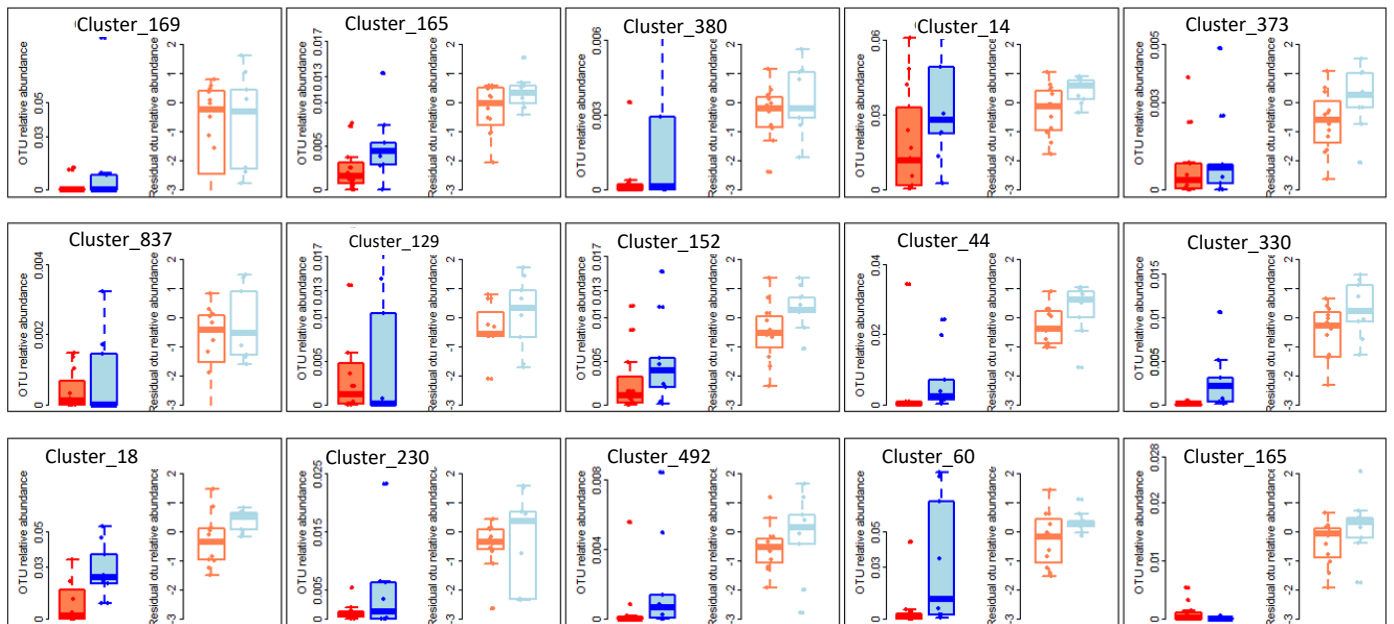

**Supplementary Figure 4. Details on the differential abundance of OTUs in the D28 fecal microbiota of high and low vaccine responders, measured by serum levels of IAV-specific IgG at D63. a** Differential abundance of OTUs that were more abundant in high responders. **b** Differential abundance of OTUs that were more abundant in low responders. For each OTU, the first boxplot displays its relative abundance in the high (red) and low (blue) responders. The second boxplot displays the same data with normalization by metagenomeSeq package of the OTU counts for gender, weaning age, and batch, as these three variables had a significant effect on IAV-specific IgG levels and were consequently set as fixed effects in the model. All data are available in Supplementary Data 6.

**Supplementary Table 1: Association between pig characteristics and diversity indices of OTUs in fecal DNA at D28 for the group of vaccinated pigs.**

| Age (day) | Zootechnical parameters | Alpha diversity |                                | Beta diversity  |
|-----------|-------------------------|-----------------|--------------------------------|-----------------|
|           |                         | Richness        | Shannon                        |                 |
| D28       | Body weight at weaning  | <b>0.0031**</b> | <b>8.0 x 10<sup>-4</sup>**</b> | <b>0.0096**</b> |
|           | Batch                   | 0.9638          | 0.8874                         | <b>0.0016**</b> |
|           | Age at weaning          | 0.8816          | 0.2691                         | <b>0.0001**</b> |
|           | Sex                     | 0.4511          | 0.4134                         | 0.5542          |

P-values are reported in the table and highlighted in bold letters where significant (\* for p-value <0.05, and \*\*for p-value<0.01). The effect of each zootechnical parameter on the alpha diversity was measured on the total vaccinated population using maximum likelihood ratio tests on linear models. Individual alpha diversity indices are available in Supplementary Data 5 for all animals. The effect of the beta diversity was measured with Bray-Curtis distances, and p-values were calculated with an Adonis test.

**Supplementary Table 2: Summary of differentially abundant genera between the two fecal DNA enterotypes found at D63.**

| Enterotype    | Phylum               | Family                 | Genus                            | Log2 FC<br>enterotype | p-value        | FDR            | Mean relative abundance |                |
|---------------|----------------------|------------------------|----------------------------------|-----------------------|----------------|----------------|-------------------------|----------------|
|               |                      |                        |                                  |                       |                |                | PM                      | T              |
| PM            | <b>Bacteroidetes</b> | <b>Prevotellaceae</b>  | <b>Prevotella 7</b>              | <b>-2.2</b>           | <b>6.8E-11</b> | <b>9.5E-09</b> | <b>3.4E-01</b>          | <b>8.0E-02</b> |
|               | <b>Firmicutes</b>    | <b>Veillonellaceae</b> | <b>Mitsuokella</b>               | <b>-2.2</b>           | <b>4.9E-10</b> | <b>3.4E-08</b> | <b>9.0E-02</b>          | <b>1.7E-02</b> |
|               | Firmicutes           | Veillonellaceae        | Multi-affiliation                | -2.0                  | 9.1E-07        | 3.1E-05        | 6.4E-03                 | 1.1E-03        |
|               | Proteobacteria       | Succinivibrionaceae    | Succinivibrionaceae UCG-001      | -1.8                  | 5.4E-03        | 3.0E-02        | 1.1E-02                 | 6.0E-04        |
|               | Proteobacteria       | Succinivibrionaceae    | Succinivibrio                    | -1.4                  | 1.5E-03        | 1.1E-02        | 1.4E-01                 | 3.8E-02        |
|               | Firmicutes           | Streptococcaceae       | Streptococcus                    | -1.1                  | 4.2E-03        | 2.6E-02        | 2.8E-02                 | 1.3E-02        |
|               | Firmicutes           | Ruminococcaceae        | Flavonifractor                   | -1.0                  | 3.5E-03        | 2.2E-02        | 1.2E-04                 | 3.6E-05        |
|               | Proteobacteria       | Succinivibrionaceae    | Anaerobiospirillum               | -0.9                  | 3.5E-03        | 2.2E-02        | 9.7E-04                 | 3.7E-04        |
|               | Firmicutes           | Veillonellaceae        | Dialister                        | -0.9                  | 6.0E-04        | 6.5E-03        | 2.6E-01                 | 1.2E-01        |
|               | Actinobacteria       | Atopobiaceae           | Olsenella                        | -0.7                  | 7.1E-03        | 3.7E-02        | 3.0E-04                 | 1.5E-04        |
|               | Firmicutes           | Lachnospiraceae        | Lachnoclostridium                | -0.7                  | 1.6E-03        | 1.1E-02        | 1.8E-03                 | 1.2E-03        |
|               | Firmicutes           | Erysipelotrichaceae    | Holdemania                       | -0.6                  | 1.6E-03        | 1.1E-02        | 7.9E-04                 | 3.9E-04        |
|               | Firmicutes           | Ruminococcaceae        | Ruminiclostridium                | -0.6                  | 1.2E-02        | 4.9E-02        | 2.0E-04                 | 2.2E-04        |
|               | Bacteroidetes        | Prevotellaceae         | Prevotella 9                     | -0.6                  | 9.0E-04        | 7.9E-03        | 1.7E+00                 | 1.3E+00        |
|               | T                    | <b>Spirochaetes</b>    | <b>Spirochaetaceae</b>           | <b>Treponema 2</b>    | <b>1.1</b>     | <b>9.3E-03</b> | <b>4.3E-02</b>          | <b>9.1E-03</b> |
| Firmicutes    |                      | Lachnospiraceae        | Anaerosporebacter                | 3.0                   | 5.5E-07        | 2.5E-05        | 3.6E-06                 | 9.5E-04        |
| Firmicutes    |                      | Lachnospiraceae        | Shuttleworthia                   | 2.9                   | 3.2E-05        | 6.4E-04        | 1.2E-02                 | 6.2E-02        |
| Bacteroidetes |                      | p-2534-18B5 gut group  | unknown genus                    | 2.1                   | 4.2E-05        | 7.0E-04        | 2.8E-04                 | 5.8E-03        |
| Firmicutes    |                      | Lachnospiraceae        | Lachnospiraceae AC2044 group     | 1.5                   | 4.5E-05        | 7.0E-04        | 1.8E-05                 | 5.5E-04        |
| Firmicutes    |                      | Erysipelotrichaceae    | Turicibacter                     | 1.4                   | 1.7E-06        | 4.8E-05        | 4.2E-05                 | 1.5E-04        |
| Bacteroidetes |                      | Prevotellaceae         | Prevotellaceae NK3B31            | 1.3                   | 5.1E-05        | 7.1E-04        | 2.6E-02                 | 8.1E-02        |
| Firmicutes    |                      | Lachnospiraceae        | unknown genus                    | 1.3                   | 1.4E-05        | 3.2E-04        | 1.0E-02                 | 2.2E-02        |
| Firmicutes    |                      | Lachnospiraceae        | Lachnospiraceae UCG-003          | 1.2                   | 8.8E-05        | 1.1E-03        | 1.2E-04                 | 7.0E-04        |
| Bacteroidetes |                      | Paludibacteraceae      | unknown genus                    | 1.1                   | 9.7E-03        | 4.3E-02        | 1.9E-06                 | 3.9E-04        |
| Bacteroidetes |                      | Prevotellaceae         | Prevotella                       | 1.1                   | 7.8E-04        | 7.8E-03        | 8.8E-05                 | 6.5E-04        |
| Firmicutes    |                      | Veillonellaceae        | Anaerovibrio                     | 1.1                   | 5.7E-03        | 3.0E-02        | 2.2E-03                 | 7.3E-03        |
| Firmicutes    |                      | Peptostreptococcaceae  | Multi-affiliation                | 1.0                   | 1.4E-04        | 1.6E-03        | 1.0E-05                 | 1.1E-04        |
| Firmicutes    |                      | Lachnospiraceae        | Agathobacter                     | 1.0                   | 1.0E-03        | 8.1E-03        | 8.8E-03                 | 1.5E-02        |
| Firmicutes    |                      | Lachnospiraceae        | [Eubacterium] xylanophilum group | 0.9                   | 5.0E-03        | 2.9E-02        | 1.1E-03                 | 2.5E-03        |
| Bacteroidetes |                      | Prevotellaceae         | Prevotella 1                     | 0.8                   | 9.0E-04        | 7.9E-03        | 3.3E-02                 | 6.8E-02        |
| Firmicutes    |                      | Lachnospiraceae        | Marvinbryantia                   | 0.7                   | 7.6E-03        | 3.8E-02        | 9.2E-04                 | 1.8E-03        |
| Bacteroidetes |                      | F082                   | unknown genus                    | 0.7                   | 9.0E-03        | 4.3E-02        | 1.3E-05                 | 5.7E-05        |
| Firmicutes    |                      | Ruminococcaceae        | Pygmaibacter                     | 0.5                   | 1.0E-02        | 4.5E-02        | 2.3E-05                 | 8.7E-05        |

The enterotype referred to as PM is more abundant in OTUs annotated to the *Prevotella* and *Mitsuokella* genera. The enterotype referred to as T is more abundant in OTUs annotated to the *Treponema* genus.

**Supplementary Table 3: Summary of the fecal microbiota OTU at D49, D63, and D146 that were found significantly differentially abundant between high and low responders to the vaccine measured by levels of seric IAV-specific IgG and haemagglutination inhibition assay at D49, D56, D63, and D146.**

| Microbial community | Vaccine response phenotype | OTU                     | Taxonomic annotation    |                               |                                       | Log2 FC            | p-value                               | FDR    | Mean relative abundance |                 |         |         |
|---------------------|----------------------------|-------------------------|-------------------------|-------------------------------|---------------------------------------|--------------------|---------------------------------------|--------|-------------------------|-----------------|---------|---------|
|                     |                            |                         | Phylum                  | Family                        | Genus                                 |                    |                                       |        | HR <sup>2</sup>         | LR <sup>3</sup> |         |         |
| D49                 | IAV specific-IgGs at D49   | Cluster_125             | Firmicutes              | Peptostreptococcaceae         | Terrisporobacter                      | -14.77             | 4.27E-04                              | 0.0287 | 0.00081                 | 0.00149         |         |         |
|                     |                            | Cluster_490             | Firmicutes              | Lachnospiraceae               | Lachnospiraceae FCS020 group          | -3.83              | 2.89E-04                              | 0.0277 | 0.00050                 | 0.00033         |         |         |
|                     |                            | Cluster_409             | Firmicutes              | Ruminococcaceae               | [Eubacterium] coprostanoligenes group | 3.32               | 5.69E-04                              | 0.0318 | 0.00018                 | 0.00047         |         |         |
|                     |                            | Cluster_693             | Firmicutes              | Ruminococcaceae               | Ruminococcaceae UCG-014               | 3.25               | 9.60E-04                              | 0.0496 | 0.00009                 | 0.00080         |         |         |
|                     |                            | Cluster_158             | Bacteroidetes           | Prevotellaceae                | Alloprevotella                        | -4.35              | 2.27E-06                              | 0.0010 | 0.00363                 | 0.00119         |         |         |
|                     |                            | Cluster_178             | Bacteroidetes           | Prevotellaceae                | Prevotellaceae NK3B31 group           | -4.10              | 3.00E-06                              | 0.0010 | 0.00346                 | 0.00145         |         |         |
|                     |                            | Cluster_120             | Bacteroidetes           | Prevotellaceae                | Prevotellaceae NK3B31 group           | -3.84              | 1.06E-05                              | 0.0024 | 0.00553                 | 0.00207         |         |         |
|                     |                            | Cluster_559             | Bacteroidetes           | Prevotellaceae                | Prevotellaceae NK3B31 group           | -3.51              | 1.84E-04                              | 0.0212 | 0.00075                 | 0.00033         |         |         |
|                     |                            | Cluster_372             | Bacteroidetes           | Prevotellaceae                | Prevotella 9                          | -3.65              | 1.09E-04                              | 0.0183 | 0.00205                 | 0.00105         |         |         |
|                     |                            | Cluster_307             | Bacteroidetes           | Prevotellaceae                | Prevotella 9                          | -2.91              | 3.89E-04                              | 0.0287 | 0.00157                 | 0.00065         |         |         |
|                     |                            | Cluster_2515            | Bacteroidetes           | Prevotellaceae                | Prevotella 9                          | -3.15              | 5.51E-04                              | 0.0318 | 0.00051                 | 0.00022         |         |         |
|                     |                            | Cluster_844             | Bacteroidetes           | Prevotellaceae                | Prevotellaceae NK3B31 group           | -3.08              | 3.31E-04                              | 0.0278 | 0.00131                 | 0.00048         |         |         |
|                     |                            | Cluster_13              | Firmicutes              | Lactobacillaceae              | Lactobacillus                         | 3.06               | 1.90E-04                              | 0.0212 | 0.01277                 | 0.01534         |         |         |
|                     |                            | HAI <sup>1</sup> at D56 | HAI <sup>1</sup> at D56 | Cluster_620                   | Firmicutes                            | Ruminococcaceae    | [Eubacterium] coprostanoligenes group | 2.28   | 8.93E-04                | 0.0496          | 0.00028 | 0.00040 |
|                     |                            |                         |                         | Cluster_159                   | Spirochaetes                          | Spirochaetaceae    | Treponema 2                           | 2.20   | 6.62E-04                | 0.0496          | 0.00080 | 0.00248 |
|                     |                            |                         |                         | Cluster_602                   | Firmicutes                            | Ruminococcaceae    | Ruminococcaceae UCG-014               | 2.05   | 4.31E-04                | 0.0496          | 0.00012 | 0.00032 |
|                     |                            |                         |                         | Cluster_857                   | Firmicutes                            | Ruminococcaceae    | unknown genus                         | 1.82   | 9.18E-04                | 0.0496          | 0.00013 | 0.00021 |
| Cluster_592         | Bacteroidetes              |                         |                         | Muribaculaceae                | unknown genus                         | 1.81               | 1.23E-03                              | 0.0496 | 0.00025                 | 0.00063         |         |         |
| Cluster_323         | Bacteroidetes              |                         |                         | Prevotellaceae                | Prevotella 7                          | 1.81               | 9.00E-04                              | 0.0496 | 0.00010                 | 0.00044         |         |         |
| Cluster_115         | Firmicutes                 |                         |                         | Ruminococcaceae               | Ruminococcaceae UCG-005               | 1.74               | 5.47E-05                              | 0.0296 | 0.00006                 | 0.00016         |         |         |
| Cluster_219         | Bacteroidetes              |                         |                         | Prevotellaceae                | Prevotella 9                          | -1.70              | 1.17E-03                              | 0.0496 | 0.00048                 | 0.00018         |         |         |
| Cluster_345         | Firmicutes                 |                         |                         | Lachnospiraceae               | Multi-affiliation                     | -1.67              | 5.07E-04                              | 0.0496 | 0.00046                 | 0.00021         |         |         |
| Cluster_735         | Firmicutes                 |                         |                         | Ruminococcaceae               | Ruminococcaceae UCG-014               | 1.66               | 3.63E-04                              | 0.0496 | 0.00005                 | 0.00017         |         |         |
| Cluster_1391        | Bacteroidetes              |                         |                         | Prevotellaceae                | Prevotella 9                          | -1.60              | 3.24E-05                              | 0.0296 | 0.00007                 | 0.00001         |         |         |
| Cluster_70          | Bacteroidetes              |                         |                         | Prevotellaceae                | Prevotella 7                          | 1.52               | 9.90E-04                              | 0.0496 | 0.00067                 | 0.00255         |         |         |
| Cluster_960         | Firmicutes                 |                         |                         | Ruminococcaceae               | Ruminococcus 1                        | 1.42               | 1.01E-03                              | 0.0496 | 0.00007                 | 0.00013         |         |         |
| Cluster_2268        | Bacteroidetes              |                         |                         | Prevotellaceae                | Alloprevotella                        | -1.38              | 3.54E-04                              | 0.0496 | 0.00017                 | 0.00006         |         |         |
| Cluster_113         | Firmicutes                 |                         |                         | Ruminococcaceae               | Ruminococcaceae NK4A214 group         | -1.36              | 5.61E-04                              | 0.0496 | 0.00004                 | 0.00002         |         |         |
| Cluster_673         | Firmicutes                 |                         |                         | Ruminococcaceae               | Ruminiclostridium 6                   | 1.35               | 1.33E-03                              | 0.0496 | 0.00012                 | 0.00024         |         |         |
| Cluster_648         | Bacteroidetes              |                         |                         | Prevotellaceae                | Prevotella 9                          | -1.35              | 4.13E-04                              | 0.0496 | 0.00009                 | 0.00002         |         |         |
| Cluster_495         | Bacteroidetes              |                         |                         | Prevotellaceae                | Prevotella 9                          | 1.35               | 8.16E-04                              | 0.0496 | 0.00016                 | 0.00020         |         |         |
| Cluster_630         | Bacteroidetes              |                         |                         | Prevotellaceae                | unknown genus                         | -1.35              | 1.14E-03                              | 0.0496 | 0.00014                 | 0.00006         |         |         |
| Cluster_888         | Firmicutes                 |                         |                         | Family XIII                   | Family XIII AD3011 group              | -1.34              | 4.99E-04                              | 0.0496 | 0.00007                 | 0.00001         |         |         |
| Cluster_262         | Firmicutes                 |                         |                         | Lachnospiraceae               | [Eubacterium] eligens group           | -1.32              | 1.11E-03                              | 0.0496 | 0.00139                 | 0.00079         |         |         |
| Cluster_554         | Firmicutes                 |                         |                         | Christensenellaceae           | Christensenellaceae R-7 group         | 1.26               | 7.66E-04                              | 0.0496 | 0.00006                 | 0.00009         |         |         |
| Cluster_662         | Bacteroidetes              |                         |                         | Muribaculaceae                | unknown genus                         | 1.23               | 1.26E-03                              | 0.0496 | 0.00034                 | 0.00038         |         |         |
| Cluster_1522        | Bacteroidetes              |                         |                         | Prevotellaceae                | unknown genus                         | -1.20              | 1.12E-03                              | 0.0496 | 0.00008                 | 0.00002         |         |         |
| Cluster_829         | Firmicutes                 |                         |                         | Veillonellaceae               | Dialister                             | -1.17              | 5.97E-04                              | 0.0496 | 0.00017                 | 0.00009         |         |         |
| Cluster_2528        | Firmicutes                 |                         |                         | Ruminococcaceae               | Ruminococcaceae UCG-014               | -1.05              | 1.28E-03                              | 0.0496 | 0.00008                 | 0.00007         |         |         |
| Cluster_594         | Bacteroidetes              |                         |                         | Prevotellaceae                | Prevotella 9                          | -1.02              | 6.06E-04                              | 0.0496 | 0.00039                 | 0.00025         |         |         |
| Cluster_37          | Firmicutes                 |                         |                         | Lachnospiraceae               | Lachnoclostridium                     | 0.96               | 1.17E-03                              | 0.0496 | 0.00006                 | 0.00012         |         |         |
| Cluster_1138        | Firmicutes                 |                         |                         | Ruminococcaceae               | Ruminococcaceae UCG-010               | 0.83               | 1.23E-03                              | 0.0496 | 0.00001                 | 0.00004         |         |         |
| HAI at D63          | HAI at D63                 |                         |                         | Cluster_18                    | Bacteroidetes                         | Rikenellaceae      | Rikenellaceae RC9 gut group           | -2.45  | 2.30E-06                | 0.0021          | 0.00242 | 0.00028 |
|                     |                            |                         |                         | Cluster_561                   | Firmicutes                            | Lachnospiraceae    | Shuttleworthia                        | -1.66  | 6.55E-05                | 0.0180          | 0.00016 | 0.00003 |
|                     |                            |                         |                         | Cluster_406                   | Epsilonbacteraeota                    | Campylobacteraceae | Campylobacter                         | 1.65   | 2.48E-04                | 0.0418          | 0.00003 | 0.00036 |
|                     |                            |                         |                         | Cluster_851                   | Firmicutes                            | Lachnospiraceae    | Shuttleworthia                        | -1.64  | 2.09E-04                | 0.0418          | 0.00019 | 0.00003 |
|                     |                            | Cluster_113             | Firmicutes              | Ruminococcaceae               | Ruminococcaceae NK4A214 group         | -1.52              | 3.77E-06                              | 0.0021 | 0.00005                 | 0.00002         |         |         |
|                     |                            | Cluster_1037            | Firmicutes              | Clostridiales vadinBB60 group | unknown genus                         | 1.46               | 2.66E-04                              | 0.0418 | 0.00001                 | 0.00009         |         |         |
|                     |                            | Cluster_357             | Bacteroidetes           | Muribaculaceae                | unknown genus                         | -1.23              | 2.31E-05                              | 0.0085 | 0.00005                 | 0.00002         |         |         |

<sup>1</sup> HAI: haemagglutination inhibition assay

<sup>2</sup> HR: High responder <sup>3</sup> LR: Low responder

| Microbial community | Vaccine response phenotype | OTU            | Taxonomic annotation |                               |                             | Log2 FC                       | p-value  | FDR      | Mean relative abundance |          |          |
|---------------------|----------------------------|----------------|----------------------|-------------------------------|-----------------------------|-------------------------------|----------|----------|-------------------------|----------|----------|
|                     |                            |                | Phylum               | Family                        | Genus                       |                               |          |          | HR                      | LR       |          |
| D63                 | HAI at D63                 | Cluster_493    | Bacteroidetes        | Prevotellaceae                | unknown genus               | 3.72                          | 5.24E-05 | 0.0183   | 0.00003                 | 0.00029  |          |
|                     |                            | Cluster_963    | Firmicutes           | Lachnospiraceae               | Anaerospobacter             | -3.26                         | 2.31E-06 | 0.0012   | 0.00046                 | 0.00011  |          |
|                     |                            | Cluster_1007   | Bacteroidetes        | Prevotellaceae                | Prevotella 1                | 2.65                          | 1.35E-06 | 0.0012   | 0.00003                 | 0.00015  |          |
|                     |                            | Cluster_1070   | Firmicutes           | Lachnospiraceae               | Fusicatenibacter            | -2.00                         | 7.75E-05 | 0.0203   | 0.00022                 | 0.00008  |          |
|                     |                            | Cluster_722    | Firmicutes           | Ruminococcaceae               | Multi-affiliation           | -1.62                         | 2.00E-04 | 0.0301   | 0.00018                 | 0.00014  |          |
|                     |                            | Cluster_370    | Bacteroidetes        | Prevotellaceae                | Prevotellaceae UCG-001      | 1.28                          | 2.01E-04 | 0.0301   | 0.00002                 | 0.00010  |          |
|                     | Cluster_113                | Firmicutes     | Ruminococcaceae      | Ruminococcaceae NK4A214 group | -1.18                       | 1.22E-04                      | 0.0255   | 0.00022  | 0.00009                 |          |          |
|                     | HAI at D146                | Cluster_1026   | Bacteroidetes        | Prevotellaceae                | Prevotella 7                | 3.13                          | 5.80E-05 | 0.0287   | 0.00009                 | 0.00036  |          |
|                     |                            | Cluster_904    | Bacteroidetes        | Prevotellaceae                | Prevotella 7                | 2.52                          | 1.29E-04 | 0.0424   | 0.00008                 | 0.00045  |          |
| Cluster_510         |                            | Bacteroidetes  | Prevotellaceae       | Prevotellaceae UCG-003        | -1.80                       | 1.21E-05                      | 0.0119   | 0.00027  | 0.00013                 |          |          |
| D146                | IAV specific-IgGs at D146  | Cluster_208    | Bacteroidetes        | Prevotellaceae                | Prevotella 9                | -4.14                         | 3.50E-06 | 0.0026   | 0.00070                 | 0.00012  |          |
|                     |                            | Cluster_416    | Firmicutes           | Lachnospiraceae               | Multi-affiliation           | -3.33                         | 1.69E-04 | 0.0240   | 0.00121                 | 0.00222  |          |
|                     |                            | Cluster_284    | Bacteroidetes        | Muribaculaceae                | unknown genus               | -3.25                         | 5.42E-06 | 0.0026   | 0.00439                 | 0.00025  |          |
|                     |                            | Cluster_66     | Spirochaetes         | Spirochaetaceae               | Treponema 2                 | -3.22                         | 7.90E-06 | 0.0026   | 0.00586                 | 0.00916  |          |
|                     |                            | Cluster_725    | Firmicutes           | Lachnospiraceae               | unknown genus               | -2.82                         | 4.31E-04 | 0.0428   | 0.00118                 | 0.00029  |          |
|                     |                            | Cluster_1213   | Firmicutes           | Streptococcaceae              | Streptococcus               | 2.65                          | 1.04E-05 | 0.0026   | 0.00028                 | 0.00136  |          |
|                     |                            | Cluster_43     | Bacteroidetes        | Muribaculaceae                | unknown genus               | -2.64                         | 1.48E-04 | 0.0240   | 0.01922                 | 0.00134  |          |
|                     |                            | Cluster_900    | Firmicutes           | Lactobacillaceae              | Lactobacillus               | 2.56                          | 2.01E-04 | 0.0250   | 0.00011                 | 0.00065  |          |
|                     |                            | Cluster_183    | Firmicutes           | Clostridiaceae 1              | Sarcina                     | -2.42                         | 3.04E-04 | 0.0336   | 0.00096                 | 0.00029  |          |
|                     |                            | Cluster_13     | Firmicutes           | Lactobacillaceae              | Lactobacillus               | 2.32                          | 1.00E-04 | 0.0199   | 0.00331                 | 0.00966  |          |
|                     |                            | HAI at D146    | Cluster_1114         | Firmicutes                    | Ruminococcaceae             | Ruminococcaceae UCG-008       | -1.57    | 9.12E-06 | 0.0056                  | 6.68E-05 | 1.89E-04 |
|                     |                            |                | Cluster_405          | Firmicutes                    | Ruminococcaceae             | Ruminococcaceae UCG-014       | 1.39     | 2.49E-05 | 0.0093                  | 4.59E-04 | 2.54E-04 |
|                     |                            |                | Cluster_1096         | Firmicutes                    | Ruminococcaceae             | unknown genus                 | 1.25     | 8.18E-05 | 0.0178                  | 3.43E-04 | 5.34E-05 |
|                     |                            |                | Cluster_367          | Firmicutes                    | Lachnospiraceae             | Lachnospiraceae NK4A136 group | -1.18    | 9.51E-05 | 0.0178                  | 6.93E-05 | 3.26E-04 |
|                     | Cluster_304                |                | Bacteroidetes        | Prevotellaceae                | Prevotellaceae NK3B31 group | -1.08                         | 4.73E-04 | 0.0475   | 9.68E-05                | 3.64E-04 |          |
|                     | Cluster_1253               |                | Bacteroidetes        | Prevotellaceae                | Prevotellaceae NK3B31 group | -1.03                         | 2.24E-04 | 0.0285   | 4.51E-05                | 2.21E-04 |          |
|                     | Cluster_220                |                | Firmicutes           | Ruminococcaceae               | Ruminococcus 1              | -1.01                         | 1.60E-04 | 0.0257   | 2.07E-04                | 1.37E-03 |          |
|                     | Cluster_753                | Firmicutes     | Ruminococcaceae      | unknown genus                 | -0.95                       | 1.00E-05                      | 0.0056   | 9.49E-05 | 2.01E-04                |          |          |
|                     | Cluster_3017               | Firmicutes     | Ruminococcaceae      | Ruminococcaceae UCG-014       | 0.84                        | 2.66E-04                      | 0.0299   | 2.39E-04 | 3.18E-05                |          |          |
|                     | Cluster_1043               | Bacteroidetes  | Prevotellaceae       | Prevotella 2                  | -0.80                       | 2.28E-04                      | 0.0285   | 4.99E-05 | 1.08E-04                |          |          |
|                     | Cluster_2515               | Bacteroidetes  | Prevotellaceae       | Prevotella 9                  | -0.76                       | 5.06E-04                      | 0.0475   | 2.14E-05 | 6.01E-05                |          |          |
| Cluster_1778        | Bacteroidetes              | Prevotellaceae | Prevotella 2         | -0.71                         | 4.11E-05                    | 0.0116                        | 2.17E-05 | 7.28E-05 |                         |          |          |



**Supplementary Table 4: Composition of pig diets during the initial, post-weaning and growing periods.**

|                                         | STARTING<br>from 28 to 34 days of age | POST-WEANING<br>from 35 to 68 days of age | GROWING<br>from 69 days of age up to<br>slaughtering |
|-----------------------------------------|---------------------------------------|-------------------------------------------|------------------------------------------------------|
| Granulometry (mm)                       | 2.2                                   | 2.8                                       | 4                                                    |
| Ingredients (% dry matter feed)         |                                       |                                           |                                                      |
| Barley                                  | 30.10                                 | 25.00                                     | 10.00                                                |
| Cereal mixture                          | 12.3                                  | -                                         | -                                                    |
| Wheat                                   | -                                     | 38.35                                     | 39.89                                                |
| Triticale                               | -                                     | 5.00                                      | 15.00                                                |
| Corn                                    | -                                     | -                                         | 8.20                                                 |
| CELTI 50% <sup>1</sup>                  | 49.95                                 | -                                         | -                                                    |
| Wheat bran                              | -                                     | 1.8                                       | -                                                    |
| Corn dregs                              | -                                     | -                                         | 2.0                                                  |
| Rapeseed meal                           | -                                     | -                                         | 9.5                                                  |
| Soybean meal 48                         | 2.3                                   | 16.30                                     | 10.10                                                |
| Expelled rapeseed meal                  | -                                     | 5.00                                      | -                                                    |
| Toasted soybean                         | -                                     | 2.00                                      | -                                                    |
| Calcium carbonate                       | -                                     | 0.41                                      | 0.78                                                 |
| Dicalcium phoshate                      | -                                     | 0.59                                      | -                                                    |
| Salt                                    | -                                     | 0.32                                      | 0.30                                                 |
| Dextrose                                | 1.50                                  | -                                         | -                                                    |
| Sodium bicarbonate                      | -                                     | 0.08                                      | 0.10                                                 |
| Cane molasses                           | 1.00                                  | -                                         | 1.5                                                  |
| Palm oil                                | 0.8                                   | 0.2                                       | -                                                    |
| Rapeseed oil                            | 0.5                                   | 1.50                                      | -                                                    |
| Methionine (liquid)                     | -                                     | 0.2                                       | -                                                    |
| Methionine                              | -                                     | -                                         | 0.03                                                 |
| L-LYSINE 50%                            | -                                     | 0.85                                      | 0.46                                                 |
| Choline (liquide)                       | 0.05                                  | -                                         | 0.05                                                 |
| Threonine                               | -                                     | 0.40                                      | 0.13                                                 |
| Bentonite clay (SMECTAGRI) <sup>2</sup> | -                                     | 1.00                                      | 1.00                                                 |
| Phytase (BELFEED) <sup>2</sup>          | -                                     | 0.20                                      | 0.20                                                 |
| Phytase (NATUPHOS 5) <sup>2</sup>       | -                                     | 0.30                                      | 0.26                                                 |
| PROPHORCE AC600                         | 0.5                                   | -                                         | -                                                    |
| AL 425 Digesta'Co <sup>2,3</sup>        | 0.5                                   | -                                         | -                                                    |
| VEVOVITALL <sup>2,4</sup>               | 0.5                                   | -                                         | -                                                    |
| CMV Post Weaning <sup>2,5</sup>         | -                                     | 0.50                                      | -                                                    |
| CMV Growing 0.5% <sup>2,5</sup>         | -                                     | -                                         | 0.50                                                 |
| Nutrients (% Dry matter feed)           |                                       |                                           |                                                      |
| Crude fiber                             | 3.3                                   | 4.15                                      | 3.86                                                 |
| Raw ash                                 | 6.5                                   | 5.76                                      | 5.55                                                 |
| Crude protein                           | 17.5                                  | 17.49                                     | 16.03                                                |
| Crude fat                               | 6.0                                   | 4.03                                      | 1.82                                                 |
| Phosphorus                              | 0.7                                   | 0.50                                      | 0.41                                                 |
| Sodium                                  | 0.2                                   | 0.16                                      | 0.16                                                 |
| Calcium                                 | 1.1                                   | undetermined                              | undetermined                                         |
| Chlorine/chloride                       | undetermined                          | 0.26                                      | 0.28                                                 |
| Met tot                                 | 0.6                                   | 0.42                                      | 0.29                                                 |
| Met + Cys tot                           | undetermined                          | 0.76                                      | 0.63                                                 |
| Lysine                                  | 1.5                                   | 1.37                                      | 1.01                                                 |
| Linoleic acid                           | undetermined                          | 1.17                                      | 0.87                                                 |
| Digestible Energy (ED) (kcal)           | undetermined                          | 3274.00                                   | 3193.59                                              |
| Energy (kcal)                           | 2718.6                                | 2350.83                                   | 2319.67                                              |

<sup>1</sup> blend of cooked wheat, wheat, soybean, cooked soybean, whey, soybean meal, coconut oil, calcium carbonate, potato protein, wheat extract, milk powder, dextrose, monocalcium phosphate, sodium chloride, vitamin A, D3, E, C, trace elements (Fe, I, Cu, Mn, Zn, Se, selenomethionine), food preservative (E324, E310), and dietary supplement (E1606, E954ii, 4a6, and 2b959).

<sup>2</sup> dieatary supplement

<sup>3</sup> Blend of calcium carbonate with wheat

<sup>4</sup> benzoic acid (food preservative)

<sup>5</sup> CMV multivitamin supplement

**Supplementary Table 5: Number of vaccinated and non-vaccinated pigs at all experimental time-points and associated data.**

|                     | Age in days (D) | Vaccine response step              | Pigs | Fecal samples |                                        | seric IAV-specific IgG data |     |     |      | HAI <sup>2</sup> data |     |     |      |
|---------------------|-----------------|------------------------------------|------|---------------|----------------------------------------|-----------------------------|-----|-----|------|-----------------------|-----|-----|------|
|                     |                 |                                    |      | collected     | exploited sequencing data <sup>1</sup> | D49                         | D56 | D63 | D146 | D49                   | D56 | D63 | D146 |
| Vaccinated pigs     | D28             | Before vaccination                 | 98   | 92            | 89                                     | 89                          | 88  | 86  | 80   | 84                    | 88  | 86  | 78   |
|                     | D49             | Early (before booster vaccination) | 98   | 98            | 97                                     | 97                          | 96  | 94  | 88   | 92                    | 96  | 94  | 86   |
|                     | D56             | Maximum intensity (after booster)  | -    | -             | -                                      | 98                          | 98  | 95  | 89   | 93                    | 97  | 95  | 88   |
|                     | D63             | Maximum intensity (after booster)  | 98   | 98            | 98                                     | 98                          | 97  | 95  | 89   | 93                    | 97  | 95  | 87   |
|                     | D146            | Persistence (before slaughtering)  | 83   | 83            | 83                                     | 83                          | 82  | 81  | 83   | 78                    | 82  | 80  | 81   |
| Non-vaccinated pigs | D28             | Before vaccination                 | 33   | 33            | 29                                     | -                           | -   | -   | -    | -                     | -   | -   | -    |
|                     | D49             | -                                  | 33   | 33            | 33                                     | -                           | -   | -   | -    | -                     | -   | -   | -    |
|                     | D56             | -                                  | -    | -             | -                                      | -                           | -   | -   | -    | -                     | -   | -   | -    |
|                     | D63             | -                                  | 33   | 33            | 33                                     | -                           | -   | -   | -    | -                     | -   | -   | -    |
|                     | D146            | -                                  | 33   | 30            | 30                                     | -                           | -   | -   | -    | -                     | -   | -   | -    |

<sup>1</sup> Number of samples kept after the rarefaction step of the fecal DNA sequencing data (see Methods section)

<sup>2</sup> HAI: haemagglutination inhibition assay
